# Supplementary material
Source: Springer Nature journal article supplement (https://www.springermedizin.de/resource/supplementary/12876_2010_481_MOESM6_ESM.pdf/9437106)

A

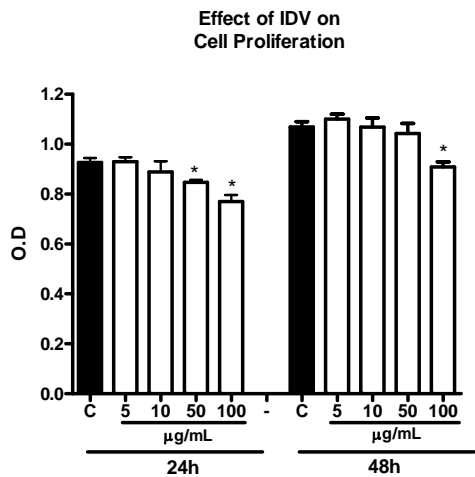

C

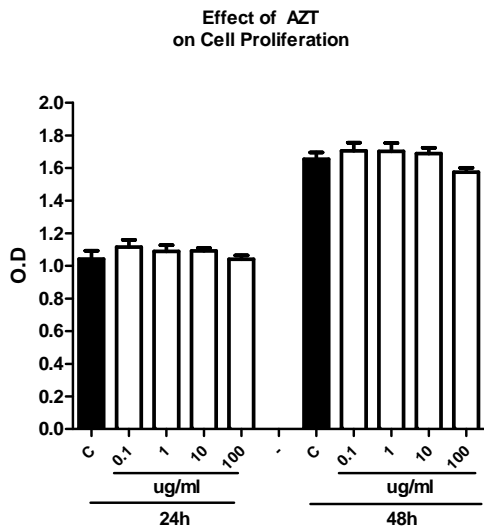

B

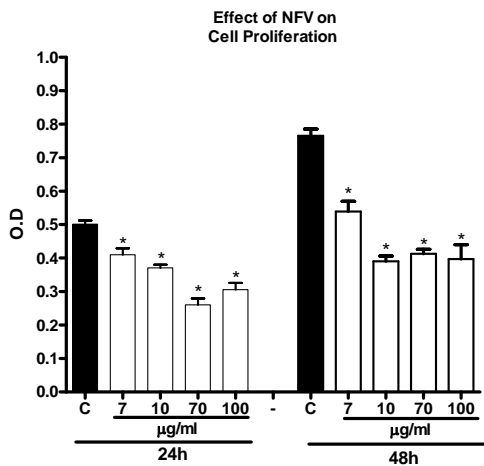

D

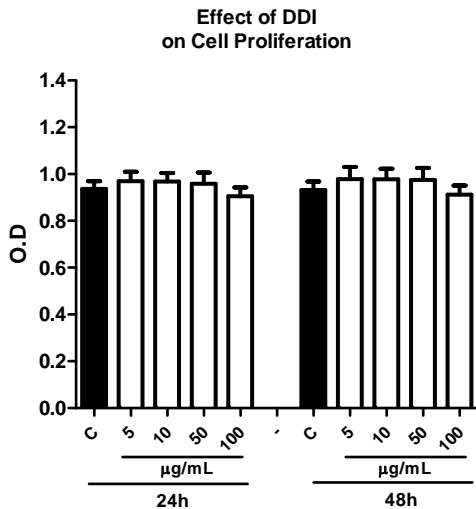

Supplement: MOESM6 [file 9437106]
